# Supplementary material for: Robust co-regulation of tyrosine phosphorylation sites on proteins reveals novel protein interactions
Source: Royal Society of Chemistry journal article supplement (doi:10.1039/c2mb25200g), 2012-07-13
Supplement: c2mb25200g.zip [file c2mb25200g.zip]

## Sheet: 7_8_11
50K seeded in AM, SS in PM, 150K controls done for 0 and 6min	counted by Yen thresholding and particle count (750, 3836) particle sizes 2-50. For large clumps, measured area and assumed area of 10 for average PLA dot, so added number of dots=area/10
EGF 0 min	Number of cells counted	Cell area	PLA dots	PLA dots/cell	1e5*PLA dots/cell area	average pla/area	stdev(pla/area)
1	1	73409	4	4	5.44892
2	2.4	176695	17	7.08333	9.6211
3	1	51156	13	13	25.4125
4	1.25	84954	14	11.2	16.4795
5	1	69584	14	14	20.1196	15.4163	8.00168
EGF 1min
1	3	125229	50	16.6667	39.9269
2	1	71756	114	114	158.872
3	1.75	127665	35	20	27.4155
4	1.5	126865	28	18.6667	22.0707
5	0.9	147432	27	30	18.3135	53.3197	59.5684
EGF 6min
1	1	92631	238	238	256.933
2* serious conglomeration	1.25	99991	320	256	320.029
3	1.3	94064	161	123.846	171.16
4	1	101629	54	54	53.1344
5	1	37209	213	213	572.442	274.74	194.186
EGF 15min
1	1	65469	12	12	18.3293
2	1	65266	4	4	6.12877
3	1	47959	3	3	6.25534
4	1	65599	2	2	3.04883
5	1	95738	24	24	25.0684	11.7661	9.46264
BGND Controls
EGFR only
1	1	52909	0	0	0
2	1.3	93351	0	0	0
3	1	67304	1	1	1.4858
4	1	49606	0	0	0
5	2	105994	3	1.5	2.83035	0.863229	1.27403

## Sheet: 7_14_11
50K seeded in AM, SS in PM, 150K controls done for 0 and 6min	counted by Yen thresholding and particle count (750, 3836) particle sizes 2-100 (increased particle size since it seems like many PLA events are blurred. For large clumps, measured area and assumed area of 10 for average PLA dot, so added number of dots=area/10
EGF 0 min	Number of cells counted	Cell area	PLA dots	PLA dots/cell	1e5*PLA dots/cell area	average pla/area	stdev(pla/area)
1	1	57839	28	28	48.4102
2	1.25	57753	13	10.4	22.5097
3	0.9	67659	16	17.7778	23.648
4	1.1	68159	35	31.8182	51.3505
5	1.4	80657	22	15.7143	27.276	34.6389	14.0629
EGF 1min
1	1	83990	15	15	17.8593
2	1	111278	4	4	3.5946
3	1	51628	5	5	9.68467
4	1	188816	14	14	7.41463
5	1.25	87674	15	12	17.1088	11.1324	6.19889
EGF 6min
1	1.25	124672	50	40	40.1052
2	1.2	96954	28	23.3333	28.8797
3	1.25	84667	93	74.4	109.842
4	1	82068	64	64	77.9841
5	1.2	116955	46	38.3333	39.3314	59.2285	33.8975
EGF 15min
1	1.25	98933	10	8	10.1079
2	1.25	62154	9	7.2	14.4802
3	1	132556	19	19	14.3336
4	1	55778	8	8	14.3426
5	1	49613	8	8	16.1248	13.8778	2.23876
BGND CTRL
PDLIM1 only
1	1	81670	1	1	1.22444
2	1.3	83307	1	0.769231	1.20038
3	1	57737	0	0	0
4	1	75867	0	0	0
5	2	119236	0	0	0	0.484964	0.664119
EGFR only
1	1	67854	0	0	0
2	1.25	61871	0	0	0
3	1.1	66933	1	0.909091	1.49403
4	1.1	71305	1	0.909091	1.40243
5	1	42685	1	1	2.34274	1.04784	1.02439

## Sheet: 9_26_11
50K seeded in AM, SS in PM, 150K controls done for 0 and 6min	counted by Yen thresholding and particle count (750, 3836) particle sizes 2-50. For large clumps, measured area and assumed area of 10 for average PLA dot, so added number of dots=area/10
	Number of cells counted	Cell area (outlined and analyzed, took area)	PLA dots	PLA dots/cell	1e5*PLA dots/cell area	average/area	stdev/area
CTRL EGFR only
1	1	65964	1	1	1.51598
2	2	68802	9	4.5	13.081
3	2.75	56912	5	1.81818	8.78549
4	1	20640	8	8	38.7597
5	1	20323	8	8	39.3643	20.3013	17.6192
CTRL PDLIM1 only
1	2	44941	8	4	17.8011
2	2	22105	18	9	81.4295
3	3.1	48508	9	2.90323	18.5536
4	3	49208	15	5	30.4828
5	2	36928	9	4.5	24.3718	34.5278	26.7125
EGF 0min
1	1	22945	92	92	400.959
2	2	20793	75	37.5	360.698
3	1.8	33428	104	57.7778	311.116
4	2	37900	194	97	511.873
5	1	25506	42	42	164.667	349.863	127.254
EGF 1min
1	1	81717	33	33	40.3833
2	1.3	48525	69	53.0769	142.195
3	2	44176	83	41.5	187.885
4	2	48329	93	46.5	192.431
5	1	26258	36	36	137.101	139.999	61.1937
EGF 6min
1	1	17581	101.4	101.4	576.759
2	2	46781	208	104	444.625
3	2	41311	226	113	547.07
4	2.6	85928	292	112.308	339.819
5	2	76583	259	129.5	338.195	449.294	111.979
EGF 15min
1	2	50604	111	55.5	219.35
2	2.15	37660	99	46.0465	262.878
3	5	82102	395	79	481.109
4	1	20455	118	118	576.876
5	2	33513	113	56.5	337.183	375.479	150.2
